# Supplementary material for: Identification of Prognostic Markers for Head and NeckSquamous Cell Carcinoma Based on Glycolysis-Related Genes
Source: Hindawi journal article supplement (doi:10.1155/2022/2762595), 2022-07-07

gender

$p = 0.41$

riskScore

3

2

1

FEMALE

MALE

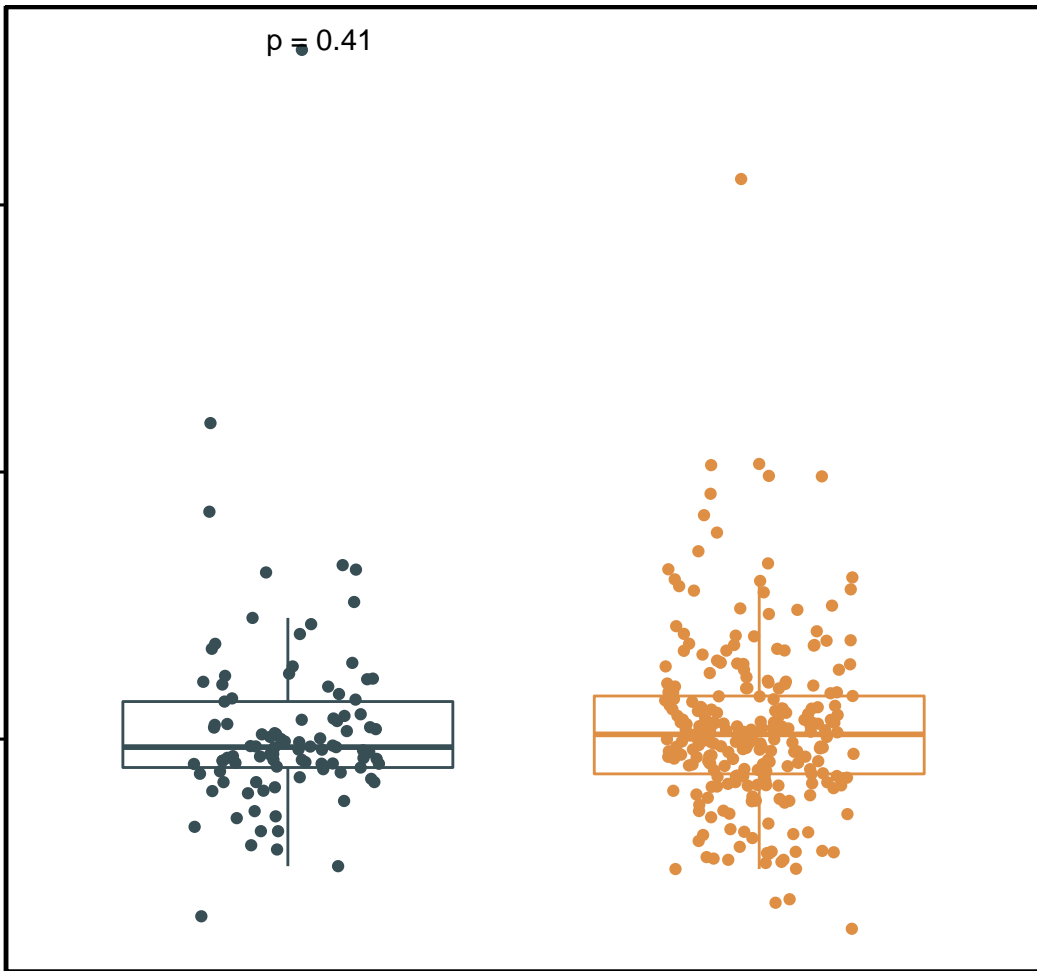

grade

$p = 0.61$

riskScore

3

2

1

G1

G2

G3

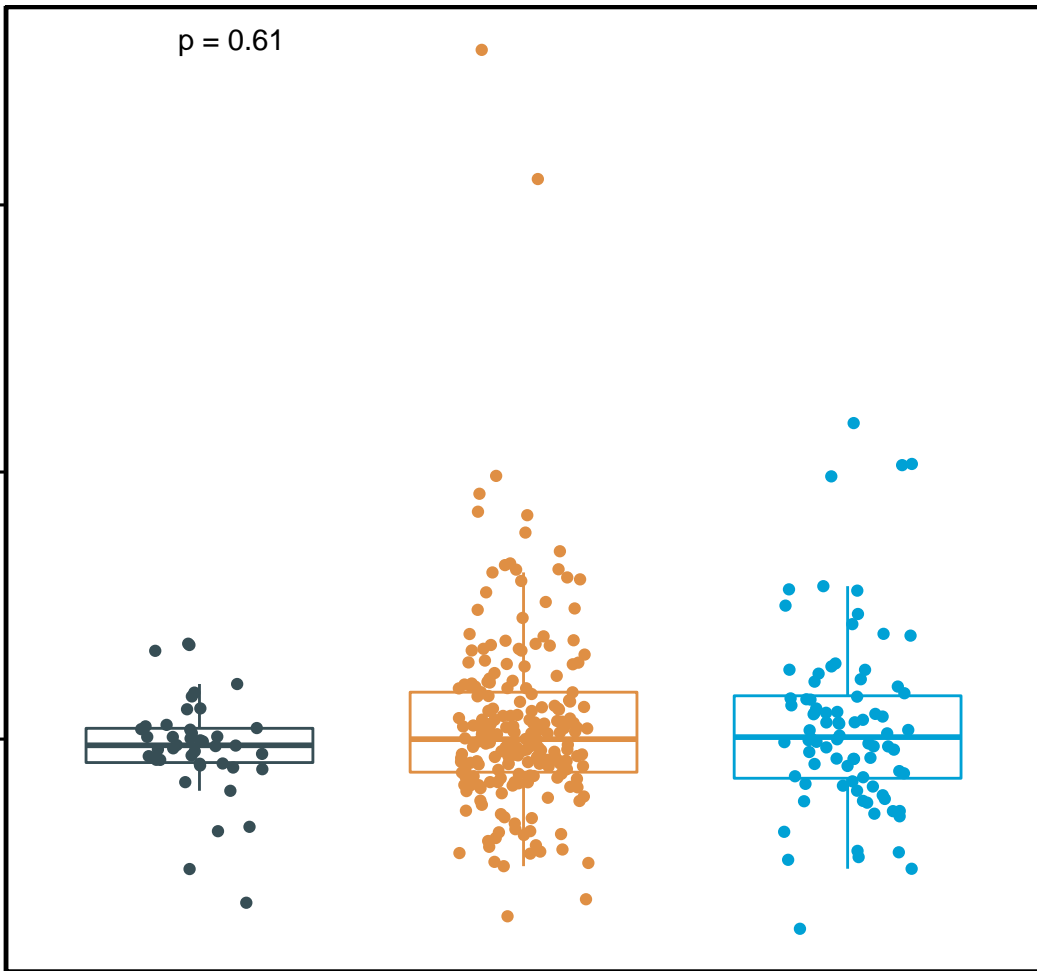

stage

$p = 0.76$

riskScore

3

2

1

Stage I

Stage II

Stage III

Stage IV

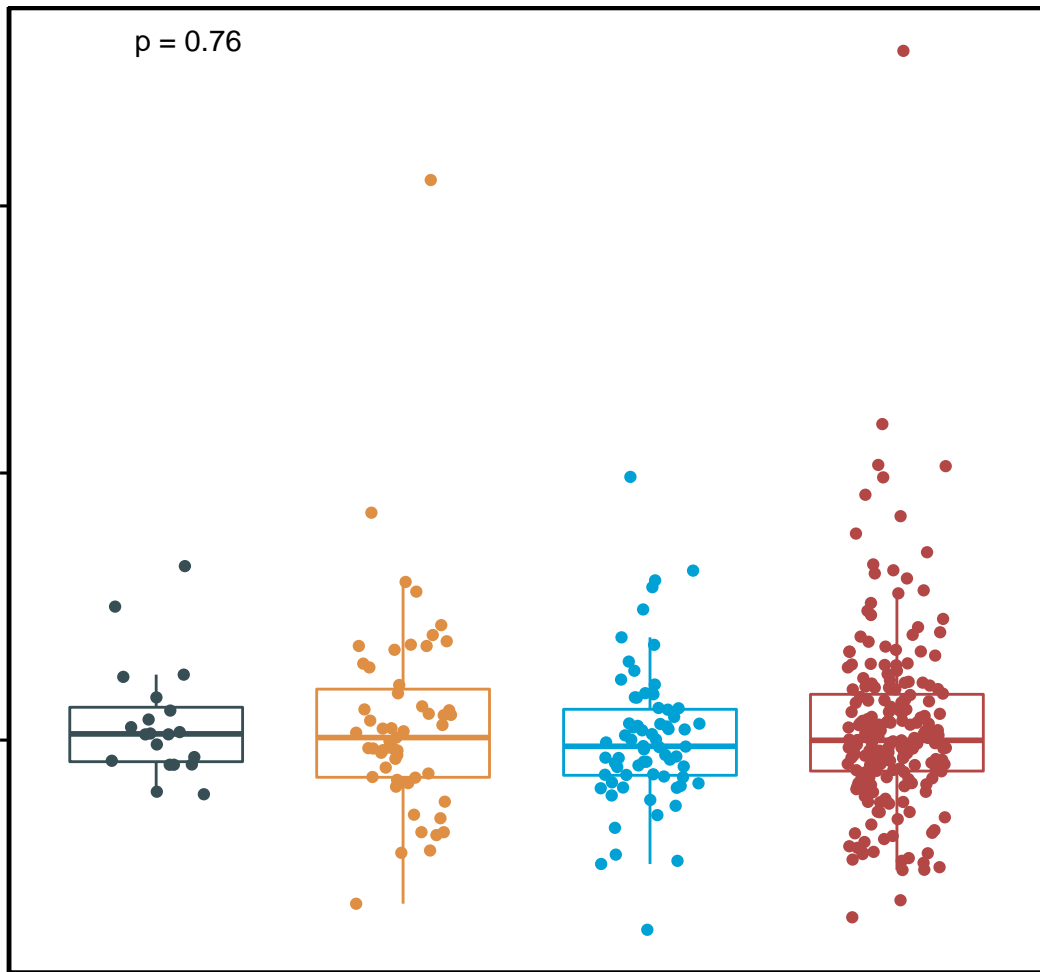

T

$p = 0.47$

riskScore

3

2

1

T1

T2

T3

T4

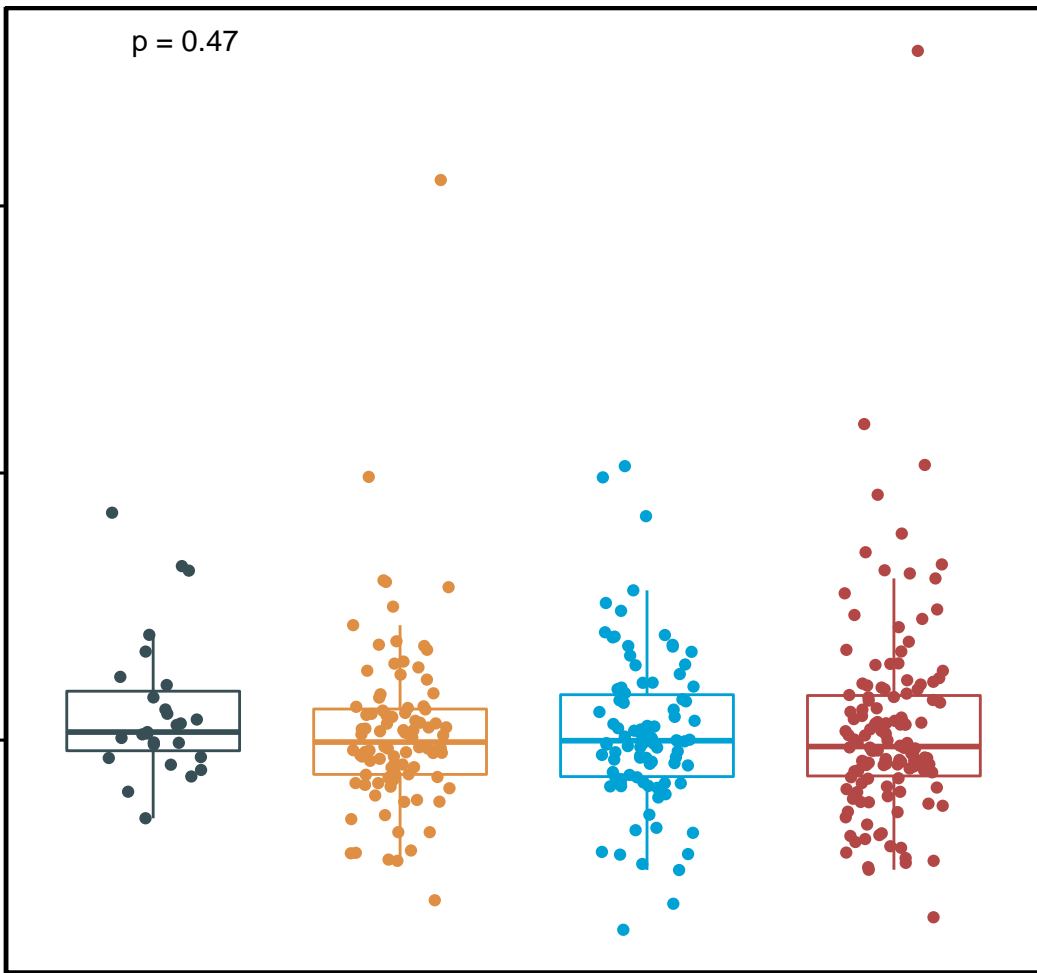

N

p = 0.91

riskScore

3

2

1

N0

N1

N2

N3

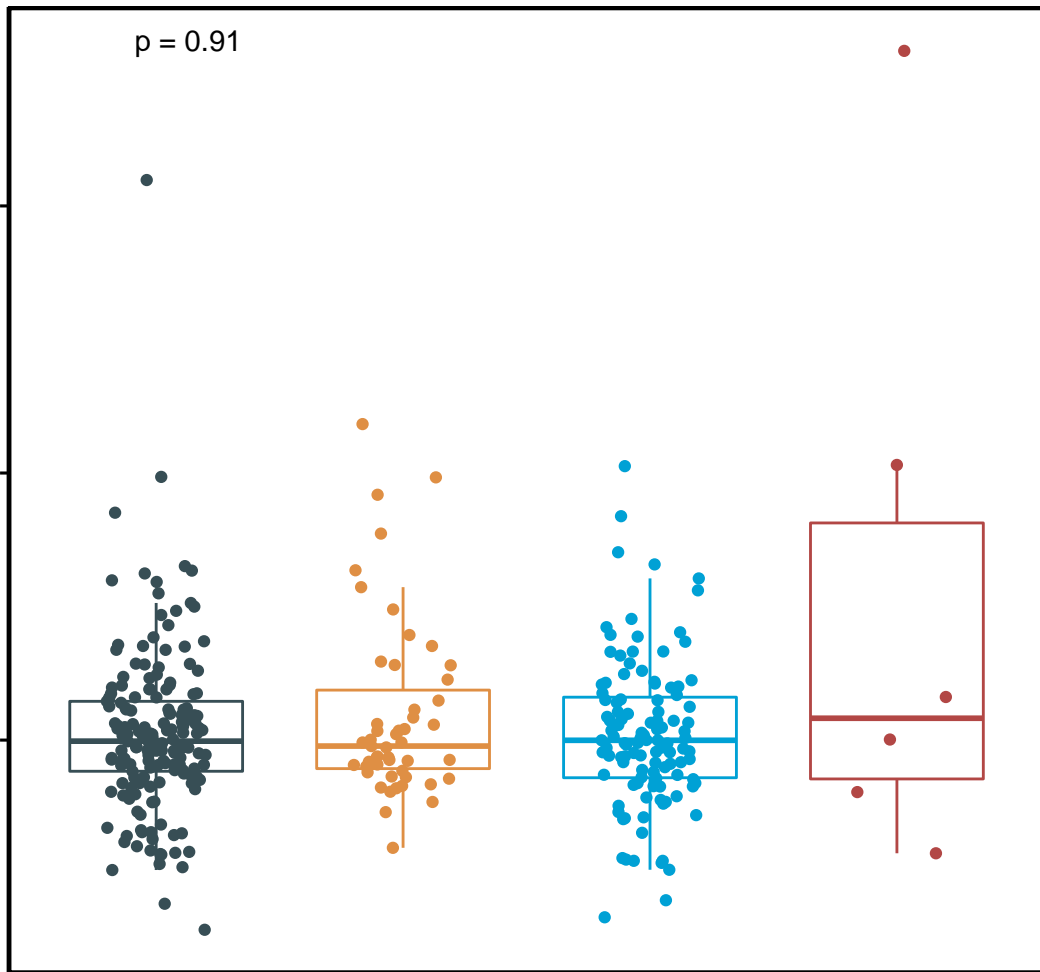

M

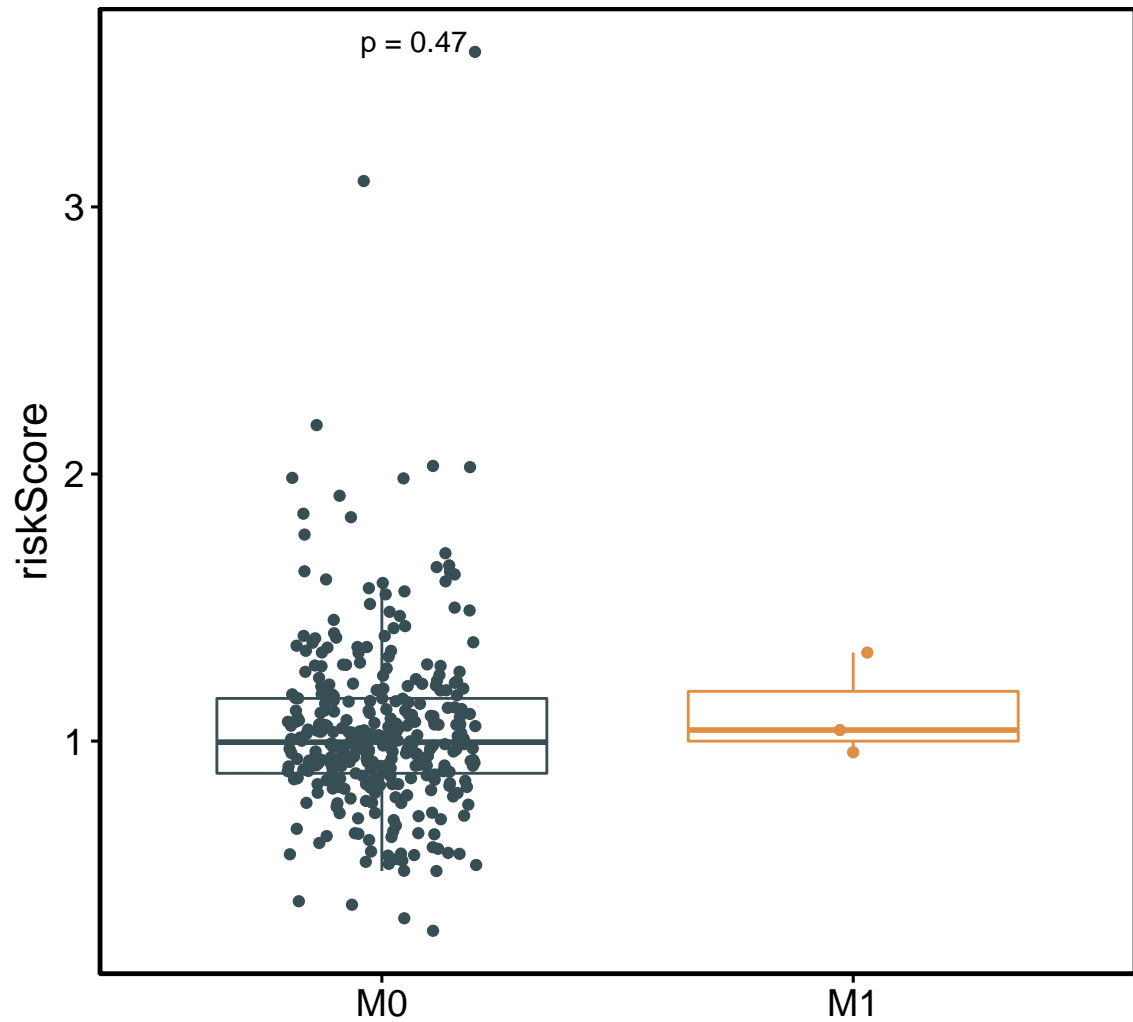

Supplement: f1 [file 2762595.f1.zip]
