# Supplementary material for: Identification of Prognostic Markers for Head and NeckSquamous Cell Carcinoma Based on Glycolysis-Related Genes
Source: Evid Based Complement Alternat Med. 2022 Jul 7;2022:2762595. doi: 10.1155/2022/2762595 (PMC9283050; doi:10.1155/2022/2762595)
Supplement: Supplementary Materials — Table S1: the clinical characteristics of the HNSCC samples in the training and testing sets. Table S2: a total of 505 DEGs between the HNSCC and normal samples. Table S3: 288 glycolysis-related genes. Figure S1: the correlation between the risk score and clinicopathological characteristics. [file 2762595.f1.zip]

Archive with 6 entries (6 files):
- 2762595.f1/Figure supplement 1.pdf
- 2762595.f1/FigureSupplement 1-A2. grade_riskScore.pdf
- 2762595.f1/SUPPLEMENTARY DESCRIPTION.docx
- 2762595.f1/Table S2.docx
- 2762595.f1/Table S3 (1).docx
- 2762595.f1/TableS1.docx
