# Supplementary figures and images for: Identification of Prognostic Markers for Head and NeckSquamous Cell Carcinoma Based on Glycolysis-Related Genes
Source: Hindawi journal article supplement (doi:10.1155/2022/2762595), 2022-07-07

grade

$p = 0.61$

riskScore

3

2

1

G1

G2

G3

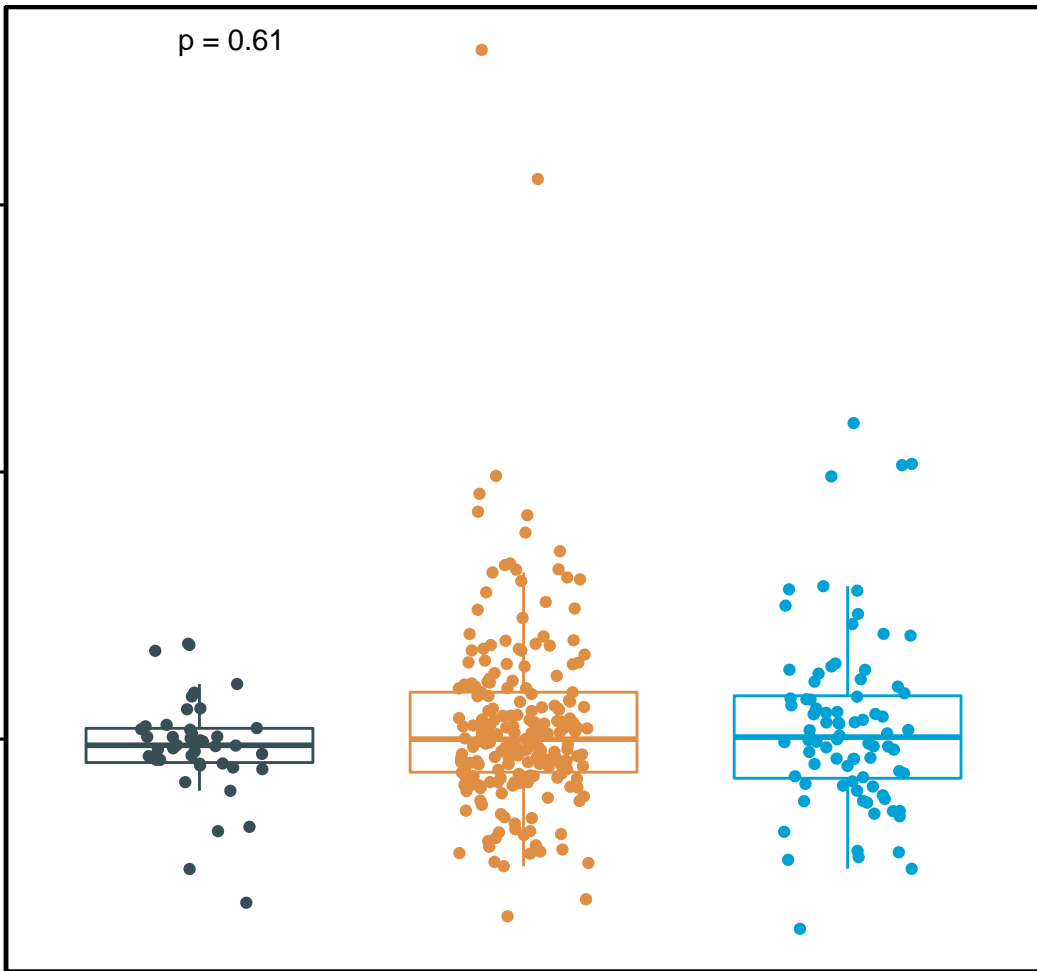

Supplement: f1 [file 2762595.f1.zip]
